# Supplementary material for: c-Abl tyrosine kinase down-regulation as target for memory improvement in Alzheimer’s disease
Source: Front Aging Neurosci. 2023 Jun 5;15:1180987. doi: 10.3389/fnagi.2023.1180987 (PMC10289333; doi:10.3389/fnagi.2023.1180987)
Supplement: Supplementary file 1 [file Table_1.XLSX]

## Sheet: Open Field APPPS1 ABL
Group	Id mouse	Time in center	Time in peripherical area	% Center Time	Distance (cm)
APP/Abl-KO	RL07	137	463	22.8333	53681.8
APP/Abl-KO	RL08	122	516	20.3333	39701.9
APP/Abl-KO	RL03	56	543	9.33333	43384.5
APP/Abl-KO	RL04	196	403	32.6667	48224.3
APP/Abl-KO	RL15	no hizo la tarea, se salia del maze
APP/Abl-KO	RL20	83.45	517.42	13.9083	53310
APP/Abl-KO	RL23	218.75	382.82	36.4583	37993
APP/Abl-KO	RL27	113.08	487.89	18.8467	39170
APP/Abl-KO	RL32	149.98	451.88	24.9967	39732
APP/Abl-KO
APP-Abl	RL06	79	521	13.1667	39138.8
APP-Abl	RL05	96	503	16	56666.1
APP-Abl	RL10	127	475	21.1667	46651.7
APP-Abl	RL29	161.23	440.54	26.8717	52946
APP-Abl	RL30	163.93	437.7	27.3217	44260
APP-Abl	RL31	137.4	464.46	22.9	44013
APP-Abl	RL33	112.01	489.76	18.6683	40526
APP-Abl	RL34	150.32	451.15	25.0533	41430
APP-Abl	RL39	146.38	455.32	24.3967	50399
APP-Abl	RL42	138.67	462.99	23.1117	40320
WT-Abl-KO	RL11	160	442	26.6667	37333.9
WT-Abl-KO	RL16	151	450	25.1667	60825.9
WT-Abl-KO	RL17	222	379	37	42800.5
WT-Abl-KO	RL18	207	394	34.5	41156
WT-Abl-KO	RL19	216	385	36	46276.9
WT-Abl-KO	RL21	263.53	338.14	43.9217	28890
WT-Abl-KO	RL22	75.64	526.19	12.6067	43713
WT-Abl-KO	RL26	168.1	433.6	28.0167	44450
WT-Abl-KO	RL28	101.47	500.73	16.9117	50341
WT-Abl-KO	RL38	170.37	431.3	28.395	41189
WT-Abl-KO	RL41	149.28	452.38	24.88	40320
WT	RL09	73	528	12.1667	47963.9
WT	RL12	224	377	37.3333	46721
WT	RL13	112	488	18.6667	41200.6
WT	RL14	167	433	27.8333	38435.7
WT	RL24	172.94	429.13	28.8233	39137
WT	RL25	341.64	260.19	56.94	32944
WT	RL35	239.84	361.83	39.9733	38850
WT	RL36	202.97	400.8	33.8283	45697
WT	RL37	181.55	421.39	30.2583	48856
WT	RL40	77.74	523.92	12.9567	53595

## Sheet: Object Location APPPS1 ABL
		Sample					Test
Goup	Id mouse	t_exp_obj1	t_exp_obj2	Total exploration	DI	Notas	t_exp_objMoved	t_exp_objUnm	ΔT(tMoved-tUnm)	Total exploration(s)	DI	Recognition Index (RI)	comments
APP/Abl-KO	RL07	9.87	7.8	17.67	11.7148		34.23	11.04	23.19	45.27	0.51226	0.75613
APP/Abl-KO	RL08	17.78	24.22	42	-15.3333		5.97	15.18	-9.21	21.15	-0.435461	0.28227	discard no more than 3 sec exploration
APP/Abl-KO	RL03	23.65	18.71	42.36	11.6619		15.58	9.14	6.44	24.72	0.260518	0.630259
APP/Abl-KO	RL04	18.28	14.81	33.09	10.4866		11.57	7.64	3.93	19.21	0.204581	0.60229
APP/Abl-KO	RL15						0.53	0.37	0.16	0.9	0.177778	0.588889	discard no more than 3 sec exploration
APP/Abl-KO	RL20						1.64	1.18	0.46	2.82	0.163121	0.58156	discard no more than 3 sec exploration
APP/Abl-KO	RL23						1.37	0.6	0.77	1.97	0.390863	0.695431	discard no more than 3 sec exploration
APP/Abl-KO	RL27						3.8	1.67	2.13	5.47	0.389397	0.694698
APP/Abl-KO	RL32						8.84	6.51	2.33	15.35	0.151792	0.575896
APP/Abl-KO
APP-Abl	RL06	21.12	20.55	41.67	1.36789		16.51	12.14	4.37	28.65	0.152531	0.576265
APP-Abl	RL05	22.55	28.12	50.67	-10.9927		8.3	9.14	-0.84	17.44	-0.0481651	0.475917
APP-Abl	RL10	0.33	0.2	0.53	24.5283	(no exploró más de 3 seg en total)	1.4	0.87	0.53	2.27	0.23348	0.61674	discard no more than 3 sec exploration
APP-Abl	RL29						7.27	7.97	-0.7	15.24	-0.0459318	0.477034
APP-Abl	RL30						11.98	16.32	-4.34	28.3	-0.153357	0.423322
APP-Abl	RL31						1.97	1.27	0.7	3.24	0.216049	0.608025
APP-Abl	RL33						1.43	3.67	-2.24	5.1	-0.439216	0.280392	discard no more than 3 sec exploration
APP-Abl	RL34						0.5	1.2	-0.7	1.7	-0.411765	0.294118	discard no more than 3 sec exploration
APP-Abl	RL39						5.71	2.97	2.74	8.68	0.315668	0.657834
APP-Abl	RL42						13.45	11.08	2.37	24.53	0.0966164	0.548308
WT-Abl-KO	RL11						12.51	3.64	8.87	16.15	0.549226	0.774613
WT-Abl-KO	RL16						24.62	15.95	8.67	40.57	0.213705	0.606852
WT-Abl-KO	RL17						14.21	9.01	5.2	23.22	0.223945	0.611972
WT-Abl-KO	RL18						7.17	7	0.17	14.17	0.0119972	0.505999
WT-Abl-KO	RL19						10.94	8.81	2.13	19.75	0.107848	0.553924
WT-Abl-KO	RL21						18.08	7.61	10.47	25.69	0.407552	0.703776
WT-Abl-KO	RL22						5.37	3.37	2	8.74	0.228833	0.614416
WT-Abl-KO	RL26						9.28	7.67	1.61	16.95	0.0949853	0.547493
WT-Abl-KO	RL28						25.33	16.78	8.55	42.11	0.20304	0.60152
WT-Abl-KO	RL38						13.41	25.69	-12.28	39.1	-0.314066	0.342967
WT-Abl-KO	RL41						17.28	10.21	7.07	27.49	0.257184	0.628592
WT	RL09	25.06	36.57	61.63	-18.676		17.42	18.49	-1.07	35.91	-0.0297967	0.485102
WT	RL12						22.86	13.31	9.55	36.17	0.264031	0.632015
WT	RL13						3	4.44	-1.44	7.44	-0.193548	0.403226
WT	RL14						3.24	3.87	-0.63	7.11	-0.0886076	0.455696
WT	RL24						8.81	5.27	3.54	14.08	0.25142	0.62571
WT	RL25						8.74	6.97	1.77	15.71	0.112667	0.556334
WT	RL36						14.75	9.24	5.51	23.99	0.229679	0.61484
WT	RL35						0.37	0.93	-0.56	1.3	-0.430769	0.284615	discard no more than 3 sec exploration
WT	RL40						1.1	0.83	0.27	1.93	0.139896	0.569948	discard no more than 3 sec exploration
WT	RL37						0.47	0.97	-0.5	1.44	-0.347222	0.326389	discard no more than 3 sec exploration

## Sheet: NOR APPPS1 ABL
		Sample					Test
Group	Id mouse	t_exp_obj1	t_exp_obj2	Total exploration	DI	Notas	time exploration new object (s)	time exploration familiar object	ΔT(I-J)	Total exploration time (s)	DI	Recognition Index (RI)	comments
APP/Abl-KO	RL07	6.67	7.9	14.57	-8.442		1.4	1.66	-0.26	3.06	-0.0849673	0.457516
APP/Abl-KO	RL08	49.38	34.26	83.64	18.0775		11.34	5.3	6.04	16.64	0.362981	0.68149
APP/Abl-KO	RL03	38.13	31.76	69.89	9.11432		11.67	7.84	3.83	19.51	0.19631	0.598155
APP/Abl-KO	RL04	3.6	1.26	4.86	48.1481	(tienen un sesgo por un objeto/locación)	0.53	0.76	-0.23	1.29	-0.178295	0.410853	discard no more than 3 sec exploration
APP/Abl-KO	RL15						0.23	0.26	-0.03	0.49	-0.0612245	0.469388	discard no more than 3 sec exploration
APP/Abl-KO	RL20						0.87	1.13	-0.26	2	-0.13	0.435	discard no more than 3 sec exploration
APP/Abl-KO	RL23						1.77	0.63	1.14	2.4	0.475	0.7375	discard no more than 3 sec exploration
APP/Abl-KO	RL27						1	0.57	0.43	1.57	0.273885	0.636943	discard no more than 3 sec exploration
APP/Abl-KO	RL32						0.4	2.24	-1.84	2.64	-0.69697	0.151515	discard no more than 3 sec exploration
APP-Abl	RL06	34.2	28.96	63.16	8.29639		24.22	15.34	8.88	39.56	0.224469	0.612235
APP-Abl	RL05	26.35	19.15	45.5	15.8242		18.18	7.44	10.74	25.62	0.419204	0.709602
APP-Abl	RL10	2.17	2.04	4.21	3.08789		0.33	0.73	-0.4	1.06	-0.377358	0.311321	discard no more than 3 sec exploration
APP-Abl	RL29						4.17	6.07	-1.9	10.24	-0.185547	0.407227
APP-Abl	RL30						2.57	1.84	0.73	4.41	0.165533	0.582766
APP-Abl	RL31						1.8	4	-2.2	5.8	-0.37931	0.310345
APP-Abl	RL33						0	0	0	0	0	0	discard no more than 3 sec exploration
APP-Abl	RL34						0.27	0.48	-0.21	0.75	-0.28	0.36	discard no more than 3 sec exploration
APP-Abl	RL39						0.87	0.47	0.4	1.34	0.298507	0.649254	discard no more than 3 sec exploration
APP-Abl	RL42						10.64	10.51	0.13	21.15	0.00614657	0.503073
WT-Abl-KO	RL11						0.97	1.74	-0.77	2.71	-0.284133	0.357934	discard no more than 3 sec exploration
WT-Abl-KO	RL16						13.48	8.27	5.21	21.75	0.23954	0.61977
WT-Abl-KO	RL17						16.62	8.51	8.11	25.13	0.322722	0.661361
WT-Abl-KO	RL18						0.17	0.37	-0.2	0.54	-0.37037	0.314815	discard no more than 3 sec exploration
WT-Abl-KO	RL19						1.67	1.43	0.24	3.1	0.0774194	0.53871
WT-Abl-KO	RL21						7.21	4.8	2.41	12.01	0.200666	0.600333
WT-Abl-KO	RL22						1.9	1.03	0.87	2.93	0.296928	0.648464
WT-Abl-KO	RL26						5.2	3.34	1.86	8.54	0.217799	0.608899
WT-Abl-KO	RL28						26.09	10.48	15.61	36.57	0.426853	0.713426
WT-Abl-KO	RL38						1.7	2.4	-0.7	4.1	-0.170732	0.414634
WT-Abl-KO	RL41						1.53	2.4	-0.87	3.93	-0.221374	0.389313
WT	RL09	15.15	14.51	29.66	2.15779		9.08	2.27	6.81	11.35	0.6	0.8
WT	RL12						3.47	2.8	0.67	6.27	0.106858	0.553429
WT	RL13						3.27	1.47	1.8	4.74	0.379747	0.689873
WT	RL14						1.53	0.73	0.8	2.26	0.353982	0.676991	discard no more than 3 sec exploration
WT	RL24						1.23	1.7	-0.47	2.93	-0.16041	0.419795	discard no more than 3 sec exploration
WT	RL25						2.4	2.07	0.33	4.47	0.0738255	0.536913
WT	RL35						0.13	0.07	0.06	0.2	0.3	0.65	discard no more than 3 sec exploration
WT	RL36						10.21	6.91	3.3	17.12	0.192757	0.596379
WT	RL37						1.33	0.668	0.662	1.998	0.331331	0.665666	discard no more than 3 sec exploration
WT	RL40						0.93	0.63	0.3	1.56	0.192308	0.596154	discard no more than 3 sec exploration

## Sheet: BM-lat escape APPPS1 ABL
								Total escape latency (sec)
			Day 1					Day 2					Day 3					Day 4
Group	Id mouse	scape box	Trial 1	Trial 2	Trial 3	Trial 4	Mean	Trial 1	Trial 2	Trial 3	Trial 4	Mean	Trial 1	Trial 2	Trial 3	Trial 4	Mean	Trial 1	Trial 2	Trial 3	Trial 4	Mean	Probe Trial_30s	Probe Trial_60s	Probe Trial_90s	%quadrant target
APP/Abl-KO	RL07	north	180	34	53	54	80.25	79	12	32	66	47.25	43	11	10	113	44.25	48	18	150	37	63.25	6.61	13.58	14.65	16.2778
APP/Abl-KO	RL08	north	180	180	178	180	179.5	180	144	128	97	137.25	36	48	180	121	96.25	109	65	40	145	89.75	1.9	10.58	10.58	11.7556
APP/Abl-KO	RL03	south	180	31	11	61	70.75	85	60	33	32	52.5	22	27	60	6	28.75	15	16	53	9	23.25	10.94	19.49	30.63	34.0333
APP/Abl-KO	RL04	east	64	16	33	8	30.25	19	27	48	11	26.25	121	106	59	140	106.5	48	161	97	4	77.5	1.8	10.51	25.26	28.0667
APP/Abl-KO	RL15	south	180	180	180	180	180	180	180	180	180	180	94	83	180	180	134.25	86	124	99	77	96.5	17.08	20.79	38	42.2222
APP/Abl-KO	RL20	north	180	180	180	180	180	180	52	53	8	73.25	34	55	33	18	35	11	28	6	20	16.25	9.18	21.62	32.6	36.2222
APP/Abl-KO	RL23	south	180	180	180	38	144.5	89	58	13	46	51.5	137	38	52	9	59	43	70	8	53	43.5	23.96	37.34	62.86	69.8444
APP/Abl-KO	RL27	north	180	90	16	13	74.75	133	108	19	122	95.5	22	41	13	180	64	12	36	88	111	61.75	16.65	25.3586	37.3039	41.4488
APP/Abl-KO	RL32	east	180	180	180	180	180	34	9	180	180	100.75	9	84	180	58	82.75	24	86	25	22	39.25	2.2022	27.661	30.8642	34.2936
APP-Abl	RL06	west	180	86	71	56	98.25	135	45	62	154	99	63	30	180	118	97.75	19	8	180	64	67.75	4.34	12.51	25.89	28.7667
APP-Abl	RL05	east	180	70	23	48	80.25	84	74	35	25	54.5	20	34	64	162	70	26	30	20	68	36	9.21	20.69	23.69	26.3222
APP-Abl	RL29	east	180	78	149	30	109.25	169	20	17	18	56	29	16	18	8	17.75	35	20	63	18	34	17.2172	25.8258	55.322	61.4689
APP-Abl	RL30	west	180	6	24	77	71.75	45	16	153	125	84.75	81	95	92	34	75.5	42	36	26	180	71	9.3426	14.0807	43.6769	48.5299
APP-Abl	RL31	north	180	180	180	180	180	68	154	44	53	79.75	180	180	180	180	180	180	180	180	177	179.25	28.8956	28.8956	28.8956	32.1062
APP-Abl	RL33	south	180	180	180	180	180	180	180	82	180	155.5	82	83	180	180	131.25	180	85	79	180	131	29.9966	41.1077	62.3288	69.2542
APP-Abl	RL34	north	180	180	64	141	141.25	180	136	23	60	99.75	44	124	169	46	95.75	23	99	154	180	114	25.0584	25.0584	32.9997	36.6663
APP-Abl	RL39	south	180	180	180	180	180	180	180	180	180	180	180	180	180	180	180	95	180	62	131	117	12.71	19.72	29.23	32.4778
APP-Abl	RL42	north	180	180	180	123	165.75	180	63	85	35	90.75	33	17	18	65	33.25	38	74	80	23	53.75	12.05	41.57	65.17	72.4111
WT-Abl-KO	RL11	north	180	180	180	180	180	160	180	5	180	131.25	180	180	180	180	180	180	70	125	57	108	14.81	24.46	24.09	26.7667
WT-Abl-KO	RL16	south	180	180	180	150	172.5	103	16	91	19	57.25	57	33	118	122	82.5	95	64	48	39	61.5	3.77	11.71	27.93	31.0333
WT-Abl-KO	RL17	east	180	180	57	133	137.5	141	160	180	49	132.5	15	53	75	17	40	66	50	55	66	59.25	12.98	30.66	48.75	54.1667
WT-Abl-KO	RL18	north	180	180	174	64	149.5	15	77	36	59	46.75	75	6	84	33	49.5	80	43	73	36	58	0.97	16.35	15.68	17.4222
WT-Abl-KO	RL19	west	180	37	56	180	113.25	139	13	59	71	70.5	32	62	38	15	36.75	12	24	26	44	26.5	8.84	13.55	20.55	22.8333
WT-Abl-KO	RL21	south	180	180	11	180	137.75	180	38	25	41	71	8	24	23	56	27.75	9	34	20	98	40.25	10.78	22.52	25.13	27.9222
WT-Abl-KO	RL22	east	180	80	109	65	108.5	60	101	21	38	55	4	14	28	38	21	24	34	35	11	26	23.79	33.9	59.96	66.6222
WT-Abl-KO	RL26	north	180	180	180	180	180	15	180	180	180	138.75	27	122	4	17	42.5	9	18	58	45	32.5	7.57	27.13	45.75	50.8333
WT-Abl-KO	RL28	south	180	45	124	79	107	32	27	71	24	38.5	180	13	53	16	65.5	13	50	74	68	51.25	19.5862	47.7142	69.7362	77.4847
WT-Abl-KO	RL38	east	180	180	180	128	167	49	24	12	12	24.25	51	66	48	70	58.75	8	45	145	23	55.25	14.01	32.53	53.32	59.2444
WT-Abl-KO	RL41	west	180	180	180	126	166.5	106	37	82	33	64.5	16	49	24	20	27.25	68	44	9	44	41.25	14.91	39.97	52.09	57.8778
WT	RL09	south	180	92	102	101	118.75	15	107	180	81	95.75	49	180	180	180	147.25	63	59	180	21	80.75	18.08	27.66	34.58	38.4222
WT	RL13	north	180	56	49	73	89.5	171	52	137	46	101.5	17	180	180	180	139.25	23	178	145	81	106.75	5.14	8.07	19.39	21.5444
WT	RL14	east	180	180	180	180	180	180	180	169	134	165.75	180	163	180	180	175.75	45	180	180	73	119.5	0	0	13.78	15.3111
WT	RL24	west	180	180	180	57	149.25	180	20	32	17	62.25	106	25	90	18	59.75	29	60	42	23	38.5	13.31	23.26	39.41	43.7889
WT	RL25	east	180	180	180	180	180	180	180	180	180	180	180	180	60	68	122	88	45	104	26	65.75	5.57	17.48	31.2	34.6667
WT	RL36	south	180	128	180	91	144.75	180	59	88	180	126.75	15	119	92	72	74.5	62	71	95	161	97.25	7.71	27.86	46.98	52.2
WT	RL35	east	180	180		180	180	146	33	55	90	81	25	73	123	24	61.25	31	81	139	72	80.75	12.31	29.2	29.2	32.4444
WT	RL40	west	180	180	180	78	154.5	37	39	69	68	53.25	14	98	141	165	104.5	33	48	51	13	36.25	11.64	29.43	37.4	41.5556

## Sheet: WT-4-month-old
						NOR_test									OLM_test
						mouse	time exploration new object (s)	time exploration familiar object (s)	ΔT(tnew-tfam)	Total exploration	DI	RI	comments		raton	time exploration moved object (s)	time exploration stationary object (s)	ΔT(tMoved-tstat)	Total exploration	DI	RI
						1	10.71	11.18	-0.47	21.89	-0.021471	0.489265			1	2.9	0.7	2.2	3.6	0.611111	0.805556
						2	21.72	15.38	6.34	37.1	0.170889	0.585445			2	9.18	4.64	4.54	13.82	0.328509	0.664255
						3	33.03	6.34	26.69	39.37	0.677927	0.838964			3	26.16	9.51	16.65	35.67	0.466779	0.733389
						4	29.36	11.38	17.98	40.74	0.441335	0.720668			4	15.78	11.24	4.54	27.02	0.168024	0.584012
						5	22.86	7.67	15.19	30.53	0.497543	0.748772			5	27.96	18.72	9.24	46.68	0.197943	0.598972
						6	22.19	5.47	16.72	27.66	0.604483	0.802242			6	24.62	12.48	12.14	37.1	0.327224	0.663612
		2nd group open field
								2do grupo									2nd group
mouse	Time center (s)	Time perioherical area (s)	% Center Time	Distance (cm)		mouse	time exploration new object (s)	time exploration familiar object (s)	ΔT(tnew-tfam)	Total exploration	DI	RI	comments		OLM_test
1	224.89	380.31		34842		1	1.4	1.7	-0.3	3.1	-0.0967742	0.451613			raton	time exploration moved object (s)	time exploration stationary object (s)	ΔT(tMoved-tstat)	Total exploration	DI	RI
2	72.57	529.9		24722		2	0.8	0.1	0.7	0.9	0.777778	0.888889	discard no more than 3 sec exploration		1	13.68	14.81	-1.13	28.49	-0.039663	0.480168
3	178.54	428.13		31283		3	9.44	6.77	2.67	16.21	0.164713	0.582357			2	6.11	3.77	2.34	9.88	0.236842	0.618421
4	184.82	416.82		38516		4	7.47	2	5.47	9.47	0.577614	0.788807			3	13.88	11.18	2.7	25.06	0.107741	0.553871
5	225.39	376.44		23736		5	3.77	3.2	0.57	6.97	0.0817791	0.54089			4	3.74	5.71	-1.97	9.45	-0.208466	0.395767
															5	13.48	15.22	-1.74	28.7	-0.0606272	0.469686

## Sheet: open field APPPS1 neurotinib
OPEN FIELD
*TG=APPSwe/PSENdeltaE9
Total distance travelled (m)
	TG-Ctrl	WT-Ctrl	TG-neurotinib	WT-neurotinib
	36.794	35.492	42.12	20
	18.071	26.472	28.41	29.95
	31.1	26.016	30.711	23.501
	32.841	48.03	42.844	31.644
	44.178	18.576	25.865	19.67
	36.652	23.49	37.62	23.629
	28.388	17.103	35.846	25.018
	17.618	28.507		15.363
		44.889	39.899	25.891
	32.412	36.544	28.407	28.876
	26.054			17
	48.866
	18.909
	17.103
Mean	29.922	30.5119	34.6358	23.6856
SD	10.2693	10.4716	6.43573	5.29025
Average speed (m/s)
	TG Ctrl	WT Ctrl	TG-neurotinib	WT-neurotinib
	0.061	0.059	0.07	0.033
	0.03	0.044	0.047	0.05
	0.052	0.043	0.051	0.039
	0.055	0.08	0.071	0.053
	0.074	0.031	0.043	0.033
	0.061	0.045	0.063	0.039
	0.047	0.045	0.06	0.042
	0.029	0.048	0.097	0.026
	0.054	0.075	0.066	0.043
	0.043	0.061	0.047	0.048
	0.048			0.028
	0.048
	0.048
Mean	0.05	0.0531	0.0615	0.0394545
SD	0.0121587	0.0153872	0.0160572	0.00884719
Total time mobile (s)
	TG Ctrl	WT Ctrl	TG-neurotinib	WT-neurotinib
	520.6	484.5	508.7	443.7
	381.2	450	455.1	379.6
	515	497.8	466.7	486.5
	549	503	535.9	358.3
	557.9	473.7	425.8	421.6
	459.3	453	516.8	378.6
	460.6	520	426.9	368.3
	370.9	382	526.9	503.2
	584.7	468.1	505	523.7
	475.6	467.1	469.2	487.9
	431.6
	591.1
	460.4
	474.9
Mean	488.057	469.92	483.7	435.14
SD	68.6913	38.0507	40.3612	62.1884
Number of entries to the center zone
	TG Ctrl	WT Ctrl	TG-neurotinib	WT-neurotinib
	48	46	20	32
	47	29	55	63
	43	31	24	27
	29	59	49	22.6
	31	30	44	30
	29	26	48	25
	31	36		36
	27	51
	21	65
	39
	19
	28
Mean	32.6667	41.4444	40	33.6571
SD	9.51872	14.3101	14.4361	13.6878
Number of entries to the inner zone
	WT Ctrl	TG Ctrl	TG-neurotinib	WT-neurotinib
	121	148	106	60
	123	142	179	176
	91	122	150	134
	154	166	154	168
	182	168	108	131
	217	215	187	140
	122	163	166	122
	174	108	168	174
	117	187	215	117
	131		163
	195
	73
	152
Mean	142.462	157.667	159.6	135.778
SD	41.442	32.4615	33.2973	36.1344
Number of entries to the outer zone
	TG Ctrl	WT Ctrl	TG-neurotinib	WT-neurotinib
	77	132	113	76
	88	106	113	131
	62	142	115	77
	117	116	116	100
	96	106	88	132
	123	93	130	46
	84	66	82	96
	105	118	131	55
	108	131	107	146
	111	153	106	111
	85			133
	110
	124
	94
Mean	98.8571	116.3	110.1	100.273
SD	18.2624	25.294	15.6805	33.7227
	Time in the center zone (s)						Time in the inner zone (s)						Time in the outer zone (s)
	WT-Ctrl	TG -Ctrl	TG-neurotinib	WT-neurotinib			WT-Ctrl	TG -Ctrl	TG-neurotinib	WT-neurotinib			WT-Ctrl	TG -Ctrl	TG-neurotinib	WT-neurotinib
	29.3	25.4	20				112.7	92.6	80.2				450.7	482	499.9	526.8
	40.8	25.1	12.8	35			122.9	97.5		126.8			434.3	477.5	513.4	438.2
		34.6	44.8	21.7			137.6	147.8	117.1	81.3			437.9	417.6	438.1	497
	36.6	20.7	31.9	27			87.6	124.7	118.6	146.5			483.1	459	449.5	426.4
	42.8	31.7	25	22.7			89.9	191.8	148.7	102.4			469.3	454.9	474.8	426.3
	24.5	21.9	40.5	39.7			71.9	136.9	157.9	190.4			514.2	565.3	369.8	401.6
	27.1			28.7			174.3	110.35	181.7	167.7			407.3	461.4	403.7
		12.1	19.7	26.8			118.2	86.6	117.2	101.2			431.1	460.6	472	463.1
	22.3	13.6	11.1				123.7		91	138.9			398.6	454.6		497.8
	24.6	14.6	23.6	9.5			170.4	130.5	183.3	67.9			467.4		522.6	393.1
		19.5		22.6				119.1		236.9				441.2	340.5
		15.7						144.3						485.6
Mean	31	21.3545	25.4889	25.9667			120.92	125.65	132.856	136			449.39	469.064	448.43	452.256
SD	7.96098	7.35124	11.5912	8.5936			33.5625	30.0863	37.1311	51.9808			35.1262	37.2018	61.067	46.5778

## Sheet: NOR APPPS1 neurotinib
Neurotinib APP/PS1 mice
NOBEL OBJECT RECOGNITION (NOR)
		Time (sec)
		object 1	novel object	toal exploration time among objects	exploration time novel object	preference index
control group
wt		19.72	15	34.72	15	0.432028
wt		27	46	73	46	0.630137
wt		12.6	18.9	31.5	18.9	0.6
wt		4	6.4	10.4	6.4	0.615385
wt		15	6.4	21.4	6.4	0.299065
wt		4	2.3	6.3	2.3	0.365079			Recognition index
wt		12	23.5	35.5	23.5	0.661972			WT	APP/PS1	WT+neurotinib	APP/PS1+neurotinib
wt		5.2	2.7	7.9	2.70	0.341772			0.432028	0.33557	0.762994	0.447531
wt		13.5	35.5	49	35.50	0.72449			0.630137	0.440141	0.603803	0.518116
wt		1.4	1.1	2.5	1.10	0.44			0.6	0.357143	0.583106	0.530895
tg		14.5	20.1	34.6	20.1	0.580925			0.615385	0.727273	0.312217	0.793548
tg		3.1	11.7	14.8	11.7	0.790541			0.299065	0	0.676113	0.38051
tg		0.7	0	0.7	0	0			0.365079	0.651163	0.390374	0.433048
tg		0.01	0	0.01	0	0			0.661972	0.753906	0.576208	0.483122
tg		15	28	43	28	0.651163			0.341772	0.6	0.810811	0.902913
tg		6.3	19.3	25.6	19.3	0.753906			0.72449	0.704944	0.383333	0.402985
tg		23.2	34.8	58	34.8	0.6			0.44	0.744387	0.612179	0.615385
tg		18.5	44.2	62.7	44.2	0.704944				0.580925	0.621622
tg		20.7	65.4	86.1	65.4	0.759582				0.790541	0.688946
tg		14.8	43.1	57.9	43.1	0.744387				0
tg		9	5	14	5	0.357143		Mean	0.510993	0.514307	0.585142	0.550805
tg		9	24	33	24	0.727273		SD	0.151843	0.27234	0.152927	0.172724
tg		27.72	14	41.72	14	0.33557
tg		12.72	10	22.72	10	0.440141
neurotinib-fed group
tg		35.8	29	64.8	29	0.447531
tg		26.6	28.6	55.2	28.6	0.518116
tg		37.2	42.1	79.3	42.1	0.530895
tg		16	61.5	77.5	61.5	0.793548
tg		26.7	16.4	43.1	16.4	0.38051
tg		19.9	15.2	35.1	15.2	0.433048
tg		49	45.8	94.8	45.8	0.483122
tg		7	65.1	72.1	65.1	0.902913
tg		4	2.7	6.7	2.7	0.402985
tg		3	4.8	7.8	4.8	0.615385
tg		14.5	20.1	34.6	20.1	0.580925
tg		3.1	11.7	14.8	11.7	0.790541
tg		0.7	0	0.7	0	0
wt		11.4	36.7	48.1	36.7	0.762994
wt		25	38.1	63.1	38.1	0.603803
wt		30.6	42.8	73.4	42.8	0.583106
wt		45.6	20.7	66.3	20.7	0.312217
wt		8	16.7	24.7	16.7	0.676113
wt		22.8	14.6	37.4	14.6	0.390374
wt		22.8	31	53.8	31	0.576208
wt		2.8	12	14.8	12	0.810811
wt		7.4	4.6	12	4.6	0.383333
wt		12.1	19.1	31.2	19.1	0.612179
wt		2.8	4.6	7.4	4.6	0.621622
wt		12.1	26.8	38.9	26.8	0.688946
*tg=APPSwe/PSENdeltaE9

## Sheet: MF APPPS1 neurotinib
Memory Flexibility
*TG=APPSwe/PSENdeltaE9
		Day
Genotype	mouse	1	2	3	4
WT CTRL	1	3	4	6	5
	2	9	12	10	5
	3	7	5	3	5
	4	5	5	5	4
	5	5	5	5	7
	6	3	3	7	4
	7	5	3	5	3
	8	6	3	3	6
	9	5	5	4	4
	10	7	4	3	5
Mean		5.5	4.9	5.1	4.8
SD		1.84089	2.64365	2.18327	1.13529
SE		0.5821	0.836	0.6904	0.359
		Day
		1	2	3	4
TG CTRL	1	11	12	15	9
	2	5	6	15	4
	3	10	10	6	15
	4	5	13	6	3
	5	10	14	6	15
	6	15	13	13	14
	7	15	3	14	13
	8	12	6	14	15
	9	13	15	15	15
	10	9	6	6	11
	11	15	15	15	15
	12	9	6	7	15
Mean		10.75	9.91667	11	12
SD		3.4935	4.27377	4.28528	4.41073
SE		1.008	1.234	1.237	1.273
		Day
		1	2	3	4
TG-neurotinib	1	11	8	12	8
	2	6	4	10	5
	3	9	9	8	3
	4	7	15	5	3
	5	15	15	9	9
	6	5	12	14	3
	7	7	6	15	6
	8	15	15	4	10
	9	8	11	3	3
	10	3	3	5	6
Mean		8.6	9.8	8.5	5.6
SD		4.00555	4.54117	4.24918	2.67499
SE		1.267	1.436	1.344	0.8459
		Day
		1	2	3	4
WT-neurotinib	1	4	3	7	3
	2	4	6	5	3
	3	6	3	4	5
	4	7	5	7	4
	5	6	12	7	7
	6	5	6	4	3
	7	4	9	7	3
	8	7	8	4	6
	9	3	3	11	3
	10	9	4	4	6
	11	4	6	9	4
Mean		5.36364	6.44755	6.27273	4.27273
SD		1.84089	2.99815	2.26078	1.56702
SE		0.5439	0.8576	0.7018	0.4491

## Sheet: MWM APPPS1 neurotinib
Morris Water Maze test
*TG=APPSwe/PSENdeltaE9
	Escape latency (s)							Escape latency (s)							Escape latency (s)							Escape latency (s)
	Day 1							Day 2							Day 3							Day 4
mouse	WT-neurotinib	TG-neurotinib	WT	TG			mouse	WT-neurotinib	TG-neurotinib	WT	TG			mouse	WT-neurotinib	TG-neurotinib	WT	TG			mouse	WT-neurotinib	TG-neurotinib	WT	TG
1	39.1	17.7	25.03	32.73			1	16.17	27.5	7.53	25.9			1	10.67	23	9.33	26.17			1	20.3	18.03	12.07	34.73
2	24.6	16	19.1	15.43			2	10	19.15	8.73	24.7			2	14.17	15.2	17.53	34.67			2	13.23	10.67	13	54.1
3	9.8	31.5	9.07	28.7			3	8.43	51.9	15.83	35.17			3	7.7	31	12.3	15.63			3	5.93	44.05	11.1	31.97
4	37.2	21.3	22.43	18.23			4	14.3	23.2	9.7	17			4	11.77	24.45	27.73	26.8			4	14.83	18.5	21.73	47.43
5	30.43	47	31.9	23.03			5	31.55	49.5	17.37	20.83			5	15.37	15	9.43	25.67			5	8.83	24.37	6.4	19.2
6	13.83	59.5	11.25	44.6			6	16.33	24.7	24.6	30.73			6	10.57	12.65	20.17	30.8			6	6.6	19.2	26.5	45.93
7	22.33	24.05	22.65	15.15			7	18.27	14.75	24.27	60			7	21.53	19.73	15.85	40.6			7	21.8	22.4	16.5	47.25
8	41.1	13.8	28.9	34.4			8	13.15	9.67	24.5	55.8				23.33	10	16.35	14.4				24.7	20	25.95	31
9	38.3	25.8		23			9	20.4	20.3		8.13				10.8	23.9		9.2				5.73	10.73		9.13
10	46.7	36.4					10	8.7	38.2						7.97							9.43
11	7.8						11	10.5							17.97							17.4
Prom	28.29	29.305	21.2913	26.1411			Prom	16.4357	27.887	16.5663	33.7662			Prom	13.8045	19.4367	16.0862	26.8425			Prom	13.5255	20.8833	16.6562	38.9513
SD	11.1017	14.667	7.92026	7.16371			SD	7.54938	14.2233	7.14482	15.9347			SD	4.48324	6.74807	6.56598	8.85248			SD	6.35645	9.84879	6.84096	11.581
SEM	4.072	4.638	2.811	3.284			SEM	2.019	4.498	2.599	5.634			SEM	1.581	2.249	2.15	3.13			SEM	2.048	3.283	2.603	4.095
	Escape latency (s)							Escape latency (s)							Escape latency (s)							Escape latency (s)
	Day 5							Day 6							Day 7							Day 8
mouse	WT-neurotinib	TG-neurotinib	WT	TG			mouse	WT-neurotinib	TG-neurotinib	WT	TG			mouse	WT-neurotinib	TG-neurotinib	WT	TG			mouse	WT-neurotinib	TG-neurotinib	WT	TG
1	21.75	30.03	14.6	29.5			1	12.53	11.8	8.37	29.53			1	18.07	20.37	7.23	16.47			1	15.23	20.13	7.03	10.03
2	12.7	5.45	11	24.17			2	7.4	19.8	10.8	17.17			2	5.9	30.9	5.33	43.97			2	11	24.1	14.17	17.5
3	6.73	27.5	6.4	25.17			3	11.5	20.85	13.03	46.13			3	24.03	33.73	4.63	17.53			3	14.5	11.2	0.593	54.93
4	20.05	32.9	15.6	25.73			4	14.37	21.17	12.4	43.6			4	5.2	8.9	10.93	17			4	8.77	9.43	18.67	25.9
5	9.27	6.57	4.07	20.73			5	15.3	25.53	4.8	16.1			5	10.13	11.1	14.7	37.97			5	7.27	9.4	0.659	22.5
6	9.37	4.4	12.47	46.57			6	13.33	11.7	17.57	39.47			6	6.9	19.27	9	18.8			6	10.43	15.697	11.43	56.53
7	7.9	10.45	11.2	60			7	17.17	12.87	13.87	25.05			7	17.53	23.55	28.9	29.97			7	8.7	14.927	4.7	31.47
	17.27	8.53	22.4	46.3				7.43	10.7	58	41.7				9.43	7.8						5.5	12.86	31.6	34.03
	6.67	19.5		5				9.33	15.03		6.17				15.53	9.07		5.07				19.7			8.3
	9.37							7.77							5.5			9.53				12.27
	13.1
Prom	12.1982	16.1478	12.2175	34.7713			Prom	11.613	16.6056	11.5486	32.3438			Prom	11.822	18.2989	11.5314	25.9586			Prom	11.2	14.718	8.17886	31.6113
SD	6.01771	11.4463	4.18553	9.22261			SD	3.51354	5.32881	4.09823	12.0137			SD	6.54983	9.78057	8.39709	11.3824			SD	3.13412	5.21517	6.88045	16.6951
SEM	1.604	3.815	1.998	5.035			SEM	1.111	1.776	1.549	4.247			SEM	2.071	3.26	3.174	4.302			SEM	1.338	1.845	2.632	5.903
	mean summary
	Latency (s)
	WT-Ably1	SD	TG-Ably1	SD	WT-Ctrl	SD	TG-Ctrl	SD
Day 1	28.29	11.1017	29.305	14.667	21.2913	7.92026	26.1411	7.16371
Day 2	16.4357	7.54938	27.887	14.2233	16.5663	7.14482	33.7662	15.9347
Day 3	13.8045	4.48324	19.4367	6.74807	16.0862	6.56598	26.8425	8.85248
Day 4	13.5255	6.35645	20.8833	9.84879	16.6562	6.84096	38.9513	11.581
Day 5	12.1982	6.01771	16.1478	11.4463	12.2175	4.18553	34.7713	9.22261
Day 5	11.613	3.51354	16.6056	5.32881	11.5486	4.09823	32.3438	12.0137
Day 7	11.822	6.54983	18.2989	9.78057	11.5314	8.39709	25.9586	11.3824
Day 8	11.2	3.13412	14.718	5.21517	8.17886	6.88045	31.6113	16.6951
	Latency (s)
	WT-neurotinib	SEM	TG-neurotinib	SEM	WT	SEM	TG	SEM
Day 1	28.29	4.072	29.305	4.638	21.2913	2.811	26.1411	3.284
Day 2	16.4357	2.019	27.887	4.498	16.5663	2.599	33.7662	5.634
Day 3	13.8045	1.581	19.4367	2.249	16.0862	2.15	26.8425	3.13
Day 4	13.5255	2.048	20.8833	3.283	16.6562	2.603	38.9513	4.095
Day 5	12.1982	1.604	16.1478	3.815	12.2175	1.998	34.7713	5.035
Day 5	11.613	1.111	16.6056	1.776	11.5486	1.549	32.3438	4.247
Day 7	11.822	2.071	18.2989	3.26	11.5314	3.174	25.9586	4.302
Day 8	11.2	1.338	14.718	1.845	8.17886	2.632	31.6113	5.903

## Sheet: WO-2 GFAP
		WO-2					GFAP	astrocytes/mm^2
		APP	APP/Abl-KO	Abl-KO	WT		APP Ctrl	APP+Neurot	WT Ctrl
	Particle count	5740	2257	79	42		78	92	58
		5172	3615	22	12		84	73	49
		3794	2075	41	4		103	63	66
			2126	93	56				65
	% Area	2.43	0.92	0.008	0.004
		1.72	1.27	0	0		GFAP	astrocytes/mm^2
		2.22	0.65	0.01	0.26		WT	APP	Abl-KO	APP/Abl-KO
			1	0.003	0.01		53		58	72
	Particle/mm^2	285	95	4	2		65	94	72	76
		240	156	1	1		58	101	74	75
		147	91	2	0.2			105		82
			88	4	2.8
				Analysis with auto treshold Otsu				*TG=APPSwe/PSENdeltaE9
	Slice	Count	Total area	Average size	% Area	Perim	IntDen	Area photo um2	partículas/ mm2
	107-TG-Ctrl.tif	10781	2073910	192	8.4	44.15	49052	24785622	435
	107-TG-Ctrl-2.tif	6997	1356244	194	5.6	40.32	49410	24106971	290
	110-TG-Ctrl.tif	5624	1151312	205	4.8	44.43	52201	24190159	232
	110-TG-Ctrl.tif	5336	1110385	208	4.7	44.62	53063	23753690	225
	109-TG-Ctrl.tif	7769	1386459	178	5.6	40.7	45506	24694643	315
	109-TG-Ctrl-2.tif	5936	1243145	209	4.8	43.7	53394	25645431	231
	Mean	7074	1386909	198	5.6	42.99	50438	24529419	288
	SD	805	101657	8	0.6	1	2090	789139	40
	Slice	Count	Total area	Average size	% Area	Perim	IntDen	Area photo um2	partículas/ mm2
	102-TG-neurotinib.tif	4054	676823	167	2.76	37.96	42573	24497021	165
	102-TG-neurotinib-2.tif	4505	595044	132	2.53	34	33682	23773944	189
	114-R2-neurotinib.tif	6963	816810	117	3.3	32	29913	24775517	281
	114-R2 (2)-neurotinib.tif	6817	652408	957	2.75	28	24404	23689183	288
	114-R3 (2)-neurotinib (2).tif	4401	664424	151	2.84	36	38498	23419995	188
	114-R3 (2)-neurotinib.tif	4335	654792	151	2.79	36	38517	23504588	184
	89-R1-TG-neurotinib.tif	5436	279485	514	1.34	20	13110	21946878	248
	90-neurotinib.tif	4438	1249453	282	5.11	50	71790	23982268	185
	Mean	5119	698655	309	2.9	34	36561	23698674	216
	SD	1164	269785	293	1	9	17050	850819	48

[truncated: 1 more sheets: NeuN neurotinib]
